# Supplementary figures and images for: Targets, Mechanisms and Cytotoxicity of Half-Sandwich Ir(III) Complexes Are Modulated by Structural Modifications on the Benzazole Ancillary Ligand
Source: MDPI journal article supplement (doi:10.3390/cancers15010107), 2022-12-24

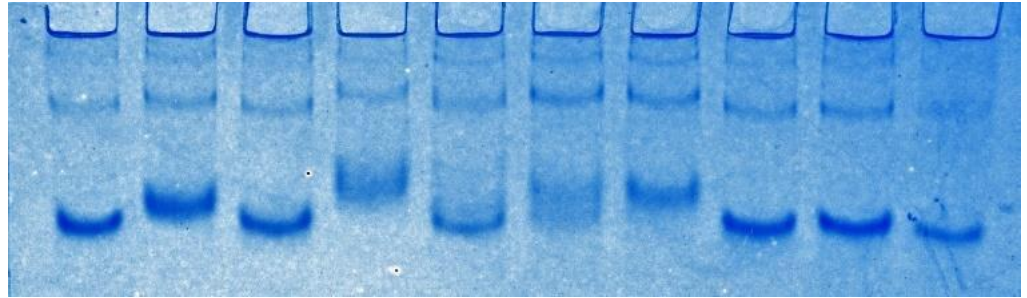

**Figure S31.** Original Western Blot for Figure 4C.

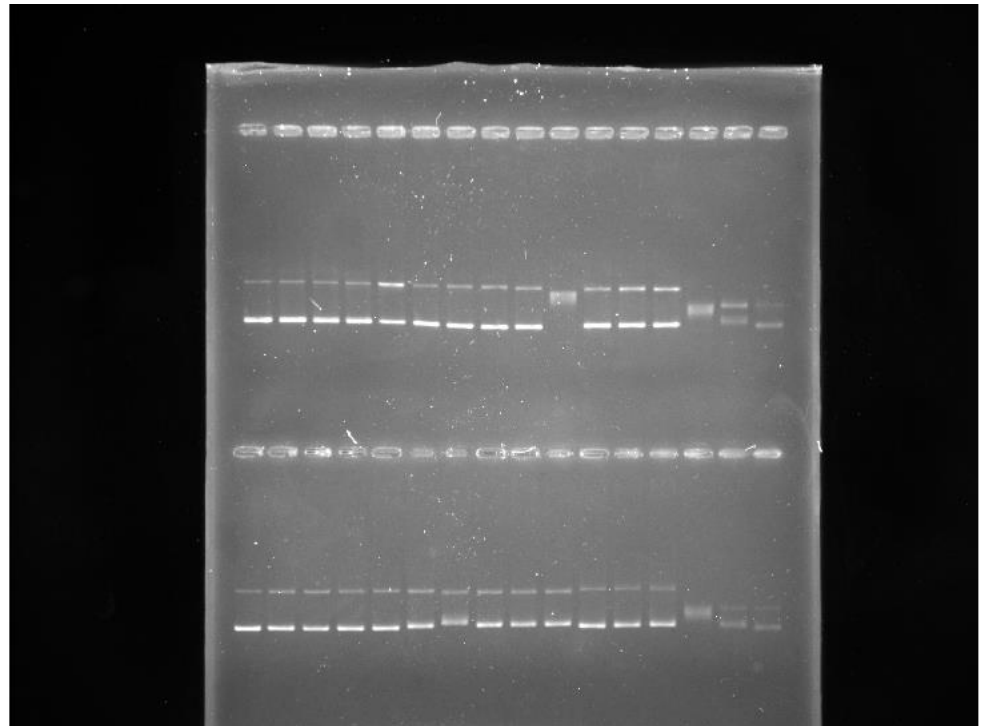

**Figure S32.** Original Western Blot for Figure S24.

Supplement: s1 [file s1]
